# Supplementary material for: Pharmacokinetics, Safety, and Tolerability of Cefiderocol, a Novel Siderophore Cephalosporin for Gram-Negative Bacteria, in Healthy Subjects
Source: PubMed Central journal article supplement (PMC5826143; doi:10.1128/aac.02163-17), 2018-02-23
Supplement: AAC.02163-17_zac003186959s1.pdf [file AAC.02163-17_zac003186959s1.pdf]

**Online Supplement for:**

**Pharmacokinetics, Safety, and Tolerability of Cefiderocol, a Novel Siderophore  
Cephalosporin for Gram-Negative Bacteria, in Healthy Subjects**

Yutaka Saisho<sup>a#</sup>, Takayuki Katsube<sup>b</sup>, Scott White<sup>c\*</sup>, Hiroyuki Fukase<sup>d</sup>, Jingoro Shimada<sup>e</sup>

Medical Affairs Department, Shionogi & Co., Ltd., Osaka, Japan<sup>a</sup>; Clinical Research  
Department, Shionogi & Co., Ltd., Osaka, Japan<sup>b</sup>; Glaxo SmithKline, Philadelphia, PA, USA<sup>c</sup>;  
CPC Clinical Trial Hospital, Kagoshima, Japan<sup>d</sup>; Shionogi & Co., Ltd., Tokyo, Japan<sup>e</sup>

**Running Head:** Pharmacokinetics and Safety of Cefiderocol

#Address correspondence to Yutaka Saisho at [yutaka.saisho@shionogi.co.jp](mailto:yutaka.saisho@shionogi.co.jp)

\*Present address: Scott White, Clinical Development, Inovio Pharmaceuticals, Inc., Plymouth  
Meeting, PA, USA.

**Supplemental Table 1.** Total iron-binding capacity ( $\mu\text{g}/\text{dl}$ ) in the multiple-dose study<sup>a</sup>

|                  |                             | Multiple-Dose Cefiderocol |                         |               |               |
|------------------|-----------------------------|---------------------------|-------------------------|---------------|---------------|
| Time point       | Statistic                   | 1000 mg 1 <sup>st</sup>   | 1000 mg 2 <sup>nd</sup> | 2000 mg       | Placebo       |
|                  |                             | (n=8)                     | (n=8) <sup>b</sup>      | (n=8)         | (n=6)         |
| Day 1 (baseline) | Mean (change from baseline) | 295.8 (0)                 | 283.1 (0)               | 281.6 (0)     | 332.7 (0)     |
|                  | SD                          | 17.4                      | 51.3                    | 26.5          | 39.9          |
|                  | Median                      | 297.0                     | 292.5                   | 278.0         | 328.5         |
|                  | Range                       | 268–315                   | 170–346                 | 249–335       | 281–396       |
| Day 2            | Mean (change from baseline) | 296.0 (+0.3)              | 279.0 (-4.1)            | 294.6 (+13.0) | 328.3 (-4.3)  |
|                  | SD                          | 15.4                      | 52.8                    | 27.7          | 36.0          |
|                  | Median                      | 302.0                     | 285.5                   | 287.5         | 322.5         |
|                  | Range                       | 266–314                   | 162–339                 | 266–349       | 280–384       |
| Day 3            | Mean (change from baseline) | 299.6 (+3.9)              | 281.0 (-2.1)            | 291.5 (+9.9)  | 331.3 (-1.3)  |
|                  | SD                          | 20.8                      | 49.9                    | 37.2          | 38.4          |
|                  | Median                      | 301.5                     | 286.5                   | 278.0         | 329.0         |
|                  | Range                       | 255–328                   | 169–336                 | 259–373       | 282–398       |
| Day 5            | Mean (change from baseline) | 295.6 (-0.1)              | 273.1 (-10.0)           | 290.1 (+8.5)  | 338.7 (+6.0)  |
|                  | SD                          | 23.3                      | 47.3                    | 35.3          | 30.2          |
|                  | Median                      | 302.0                     | 279.5                   | 285.5         | 328.0         |
|                  | Range                       | 249–317                   | 170–334                 | 245–358       | 304–379       |
| Day 8            | Mean (change from baseline) | 303.1 (+7.4)              | 271.8 (-11.4)           | 290.0 (+8.4)  | 335.8 (+3.2)  |
|                  | SD                          | 24.2                      | 47.1                    | 33.9          | 26.1          |
|                  | Median                      | 307.0                     | 284.0                   | 286.5         | 330.0         |
|                  | Range                       | 255–334                   | 168–317                 | 246–353       | 312–386       |
| Day 10           | Mean (change from baseline) | 291.4 (-4.4)              | 287.4 (-11.9)           | 277.8 (-3.9)  | 321.8 (-10.8) |
|                  | SD                          | 25.4                      | 22.1                    | 35.4          | 28.6          |

|        |                             |               |               |               |               |
|--------|-----------------------------|---------------|---------------|---------------|---------------|
|        | Median                      | 294.5         | 276.0         | 271.0         | 312.5         |
|        | Range                       | 248–322       | 265–321       | 234–354       | 296–376       |
| Day 11 | Mean (change from baseline) | 296.9 (+1.1)  | 291.7 (-7.6)  | 289.4 (+7.8)  | 333.2 (+0.5)  |
|        | SD                          | 25.1          | 23.8          | 41.1          | 26.5          |
|        | Median                      | 299.5         | 287.0         | 280.0         | 330.5         |
|        | Range                       | 249–324       | 260–327       | 242–375       | 308–382       |
| Day 12 | Mean (change from baseline) | 303.8 (+8.0)  | 301.1 (+1.9)  | 298.3 (+16.6) | 334.5 (+1.8)  |
|        | SD                          | 21.4          | 17.6          | 47.1          | 28.9          |
|        | Median                      | 303.0         | 300.0         | 291.0         | 330.5         |
|        | Range                       | 270–337       | 281–329       | 250–385       | 309–388       |
| Day 13 | Mean (change from baseline) | 296.1 (+0.4)  | 310.1 (+10.9) | 297.6 (+16.0) | 330.5 (-2.2)  |
|        | SD                          | 33.0          | 29.0          | 42.7          | 29.5          |
|        | Median                      | 285.5         | 310.0         | 293.5         | 323.5         |
|        | Range                       | 248–337       | 274–361       | 256–378       | 305–387       |
| Day 14 | Mean (change from baseline) | 290.8 (-5.0)  | 290.0 (-9.3)  | 292.1 (+10.5) | 323.5 (-9.2)  |
|        | SD                          | 26.1          | 27.6          | 31.3          | 25.7          |
|        | Median                      | 285.5         | 294.0         | 289.0         | 314.5         |
|        | Range                       | 252–333       | 260–332       | 255–341       | 296–367       |
| Day 17 | Mean (change from baseline) | 277.6 (-18.1) | 291.7 (-7.6)  | 289.8 (+8.1)  | 314.7 (-18.0) |
|        | SD                          | 23.6          | 27.2          | 28.5          | 25.2          |
|        | Median                      | 287.5         | 283.0         | 283.0         | 314.5         |
|        | Range                       | 240–297       | 260–326       | 268–356       | 281–353       |

---

<sup>a</sup>Reference range: 290–355 µg/dl.

<sup>b</sup>n=7 for days 10, 11, 12, 14, and 17.
